# Supplementary material for: The novel lncRNA lnc-NR2F1 is pro-neurogenic and mutated in human neurodevelopmental disorders
Source: eLife journal article supplement (doi:10.7554/elife.41770), 2019-01-10

# Figure 2 - figure supplement 1

## A Synteny conservation

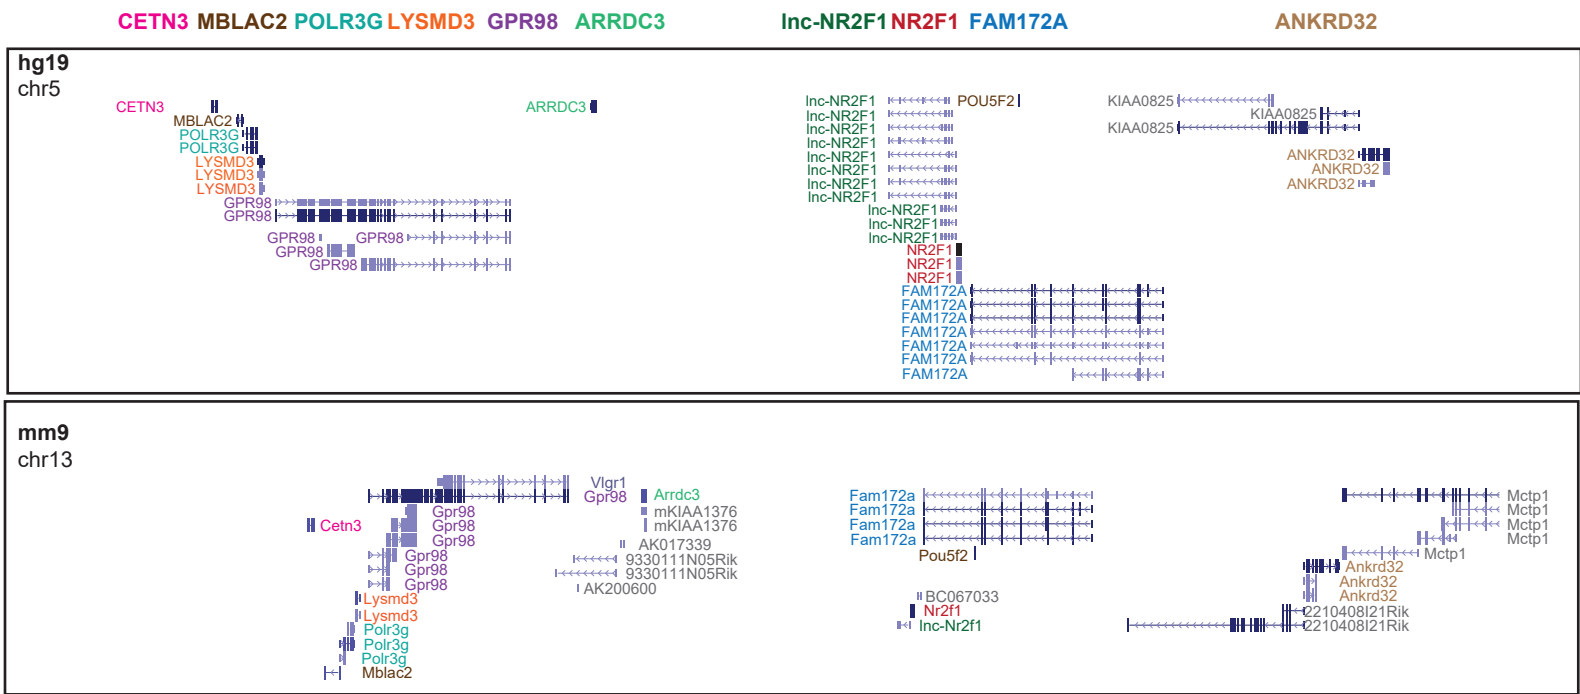

## B Sequence conservation

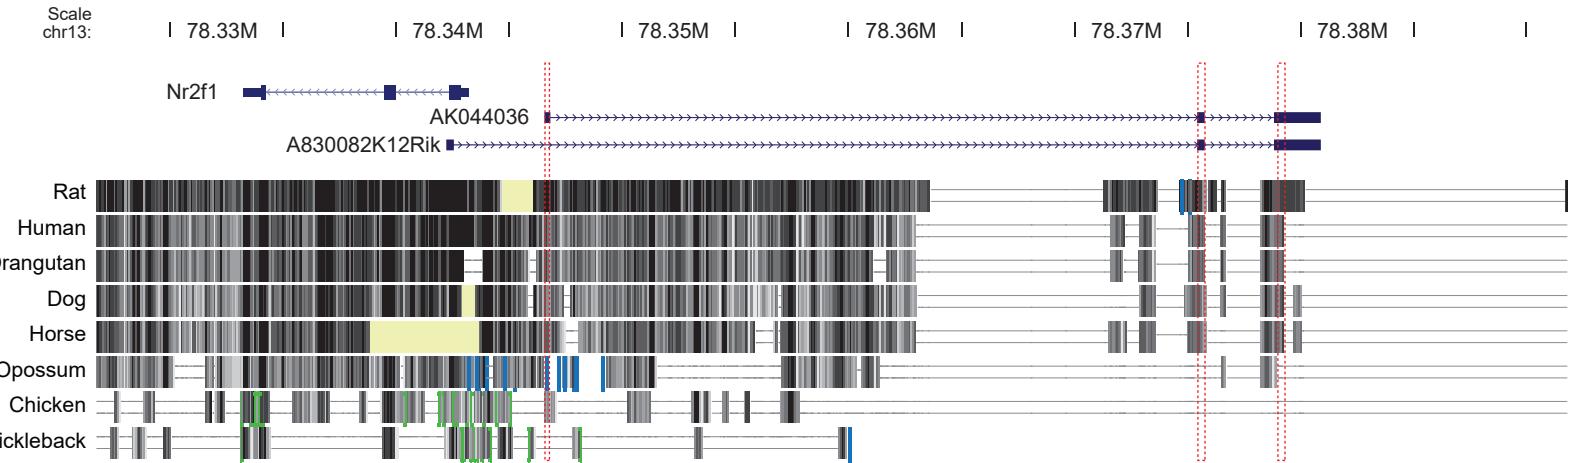

## C Microdomain conservation

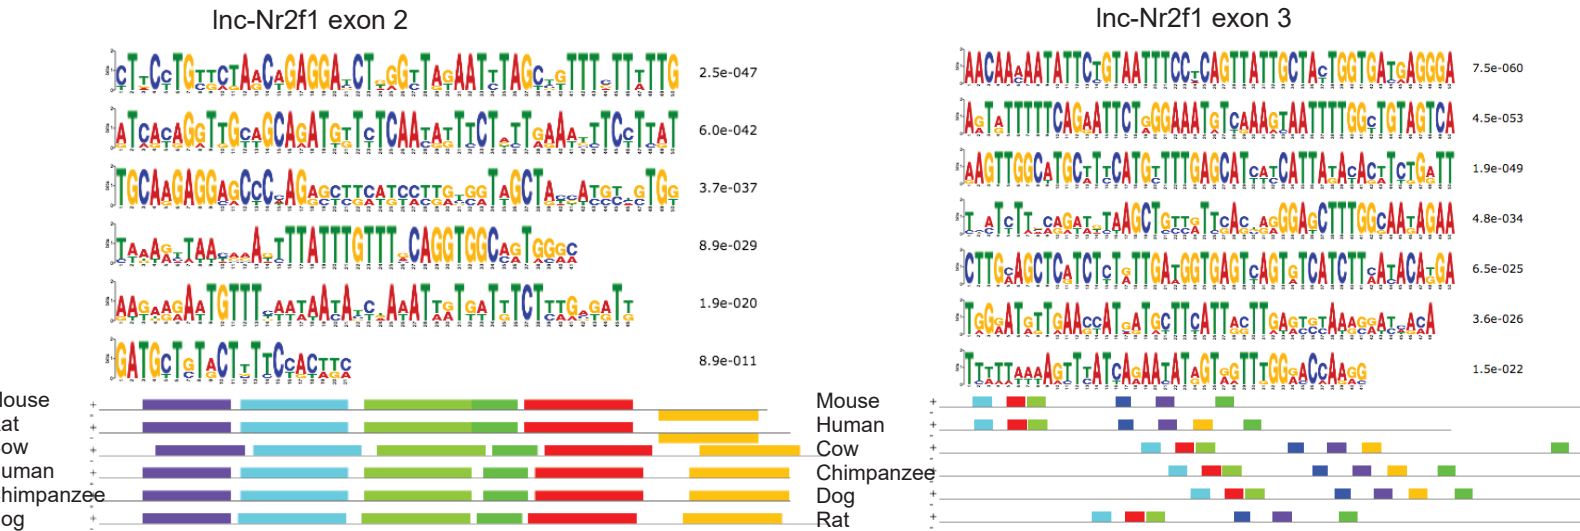

Supplement: supp [file elife-41770-supp-v1.zip]
