# Supplementary material for: The novel lncRNA lnc-NR2F1 is pro-neurogenic and mutated in human neurodevelopmental disorders
Source: eLife. 2019 Jan 10;8:e41770. doi: 10.7554/eLife.41770 (PMC6380841; doi:10.7554/eLife.41770)
Supplement: Supplementary file 2. [file elife-41770-supp2.xlsx]

## Sheet: mouse
ChIRP probes for mouse lnc-Nr2f1:
mncE_1Odd_142	gttagagcaagcagagttca
mncE_2Even_22	gaaaccatctgcagcaatct
mncE_3Odd_1241	gcagtttaatacagcacttt
mncE_4Even_1609	tcgaggttaggcatggcatc
mncE_5Odd_207	aaagctccttcctcaacaac
mncE_6Even_240	aaattaacctgctgcttggt
mncE_7Odd_262	tttccagttgtgtcaacagt
mncE_8Even_295	catagcatctccaatgcata
mncE_10Even_345	agcatcatacttcactatcc
mncE_11Odd_479	agcacatgacaacatctggc
mncE_12Even_515	agtaatcccccattcaatag
mncE_13Odd_734	gcagtgttcactgaggatat
mncE_14Even_849	atataaggcctcaatcaccc
mncE_15Odd_1072	tgaagtctagttccagcata
mncE_17Odd_1154	actttattaccacaaccata
