# Supplementary material for: The novel lncRNA lnc-NR2F1 is pro-neurogenic and mutated in human neurodevelopmental disorders
Source: eLife. 2019 Jan 10;8:e41770. doi: 10.7554/eLife.41770 (PMC6380841; doi:10.7554/eLife.41770)
Supplement: Supplementary file 3. [file elife-41770-supp3.xlsx]

## Sheet: mouse
embryonic
Sample	Abbreviation	Dissection method	Age of animal	# Lanes	Read type	Read Length	# Aligned Reads	GEO #	Reference
E15 Whole Brain	E15	whole brain	E15	9	Single	36	58.7 million	GSE22131	Gregg 2010
cortical plate 1	CP_1	Laser dissection	E14.5	2	Paired	75	56.7 million	GSE30765	Ayoub 2011
cortical plate 2	CP_2	Laser dissection	E14.5	2	Paired	75	59.6 million	GSE30765	Ayoub 2011
subventricular zone/ intermediate zone 1	SVZ/IZ_1	Laser dissection	E14.5	2	Paired	75	50.4 million	GSE30765	Ayoub 2011
subventricular zone/ intermediate zone 2	SVZ/IZ_2	Laser dissection	E14.5	2	Paired	75	53.0 million	GSE30765	Ayoub 2011
ventricular zone 1	VZ_1	Laser dissection	E14.5	2	Paired	75	54.2 million	GSE30765	Ayoub 2011
ventricular zone 2	VZ_2	Laser dissection	E14.5	2	Paired	75	52.4 million	GSE30765	Ayoub 2011
ventricular zone (1 through 5 embryos)	VZ_3	laser-capture microdissection	E14.5	5	Single	75	24.5 million	GSE38805	Fertz 2012
subventricular zone (1 through 5 embryos)	SVZ_3	laser-capture microdissection	E14.5	5	Single	75	22.7 million	GSE38805	Fertz 2012
cortical plate (1 through 5 embryos)	CP_3	laser-capture microdissection	E14.5	5	Single	75	29.8 million	GSE38805	Fertz 2012
adult
Sample	Abbreviation	Dissection method	Age of animal	# Lanes	Read type	Read Length	# Aligned Reads	GEO #	Reference
Prefrontal cortex	PFC	vibratome+micodissection	adult	7	Single	36	45.6 million	GSE22131	Gregg 2010
preoptic area	POA	vibratome+micodissection	adult	5	Single	36	37.8 million	GSE22131	Gregg 2010
cortical dissection, layer 2/3	CTXA	Microdissection	adult	4	Paired	50	103 million	GSE27243	Belgard 2011/Ponting
cortical dissection, layer 4	CTXB	Microdissection	adult	5	Paired	50	114 million	GSE27243	Belgard 2011/Ponting
cortical dissection, layer 5	CTXC	Microdissection	adult	4	Paired	50	106 million	GSE27243	Belgard 2011/Ponting
cortical dissection, layer 5	CTXD	Microdissection	adult	4	Paired	50	115 million	GSE27243	Belgard 2011/Ponting
cortical dissection, layer 6	CTXE	Microdissection	adult	4	Paired	50	107 million	GSE27243	Belgard 2011/Ponting
cortical dissection, layer 6b	CTXF	Microdissection	adult	5	Paired	50/75	115 million	GSE27243	Belgard 2011/Ponting
striatum	STR	microdissetion	adult	2	Single	40 bp	76.4 million	GSE45282	Ramos 2013/Lim
adult subventricular zone 2	SVZ_2	microdissetion	adult	2	Single	40 bp	68.1 million	GSE45282	Ramos 2013/Lim
adult subventricular zone 1	SVZ_1	microdissetion	adult	2	*Single	85/100 bp	229 million	GSE45282	Ramos 2013/Lim
olfactory bulb	OB	microdissetion	adult	2	Paired	85/100 bp	248 million	GSE45282	Ramos 2013/Lim
dentate gyrus	DG	vibratome+micodissection	adult	2	Paired	85/100 bp	157 milion	GSE45282	Ramos 2013/Lim
Sample	Abbreviation	Dissection method	Age of animal	# Lanes	Read type	Read Length	# Aligned Reads	GEO #	Reference
fetal	fetal	frontal cortex			Single		~200 million	GSE47966	Ecker, 2013
one week	week_one	frontal cortex			Single		~200 million	GSE47966	Ecker, 2013
two weeks	week_two	frontal cortex			Single		~200 million	GSE47966	Ecker, 2013
four weeks	week_four	frontal cortex			Single		~200 million	GSE47966	Ecker, 2013
six weeks	week_six	frontal cortex			Single		~200 million	GSE47966	Ecker, 2013
ten weeks	week_ten	frontal cortex			Single		~200 million	GSE47966	Ecker, 2013
twentytwo months	twentytwo_months	frontal cortex			Single		~200 million	GSE47966	Ecker, 2013
NPCs (E13.5)		cortical dissection of E13.5 brain grown in culture with growth factors		1	Paired		~200 million	GSE43916	Wapinski, 2013
cortical neurons		sorted from TauGFP neurons		1	Paired		~200 million	GSE43916	Wapinski, 2013

## Sheet: human
Sample	Abbreviation	Dissection method	# Lanes	Read type	Read Length	# Aligned Reads	GEO #	Reference
35 days	35 days	Middle frontal gyrus		Paired		~200 million	GSE47966	Ecker, 2013
2 years	2 years	Middle frontal gyrus		Paired		~200 million	GSE47966	Ecker, 2014
5 years	5 years	Middle frontal gyrus		Paired		~200 million	GSE47966	Ecker, 2015
12 years	12 years	Middle frontal gyrus		Paired		~200 million	GSE47966	Ecker, 2016
16 years	16 years	Middle frontal gyrus		Paired		~200 million	GSE47966	Ecker, 2017
25 years	25 years	Middle frontal gyrus		Paired		~200 million	GSE47966	Ecker, 2018
53 years	53 years	Dorsal prefrontal cortex		Single		~200 million	GSE47966	Ecker, 2019
