# Supplementary material for: The novel lncRNA lnc-NR2F1 is pro-neurogenic and mutated in human neurodevelopmental disorders
Source: eLife. 2019 Jan 10;8:e41770. doi: 10.7554/eLife.41770 (PMC6380841; doi:10.7554/eLife.41770)
Supplement: Supplementary file 4. [file elife-41770-supp4.xlsx]

## Sheet: Sheet1
qRT-PCR primers
target		sequence (5' to 3')
lncRNA_A	FWD	AGCGGGTACAGGCACTTACT
lncRNA_A	REV	TGCAGAGGTCAAGGAACAAC
lncRNA_B	FWD	CTCTTGGATGCCTTTGTGAA
lncRNA_B	REV	CCACACACGGTACCACCTAC
lncRNA_C	FWD	AGTTGGCTTACAGGAGGGAA
lncRNA_C	REV	CACTGGTGGAGGAGAAGGTT
lncRNA_D	FWD	TCTAAGGCTCTTACTGTGCTGCT
lncRNA_D	REV	AGCTGAGTGTTGTGGTTTGC
lncRNA_E	FWD	AGGAAGGAGCTTTGGCAATA
lncRNA_E	REV	ATCCGTTTCCAGTTGTGTCA
lncRNA_F	FWD	GCCTCTATCCCGTTCTCTTG
lncRNA_F	REV	GAGAGAAGGTGGCCCATAAA
lncRNA_G	FWD	AAGAGGAAGAGCCAGGATCA
lncRNA_G	REV	TTGTGGCAAGACTTCTCTGG
lncRNA_H	FWD	AAGCGAGCCTAAGTGGTTGT
lncRNA_H	REV	ATCAGACACATCTCCACCGA
lncRNA_I	FWD	CTGACATGCTTTCTTGTTCCA
lncRNA_I	REV	TGCATGCTTGTTTAGAGGACA
lncRNA_J	FWD	CTGTGTGTGGCTATGCGTT
lncRNA_J	REV	GTTCCTCCTTCTGGCCTTG
lncRNA_K	FWD	TCCTTGTTGGAGGAATTGTG
lncRNA_K	REV	CATGGTTGCAGTCTTGATCC
lncRNA_L	FWD	GGAAACCTAAGGTGCTGGAG
lncRNA_L	REV	TCTGCATCTCTTTGGTGGAA
lncRNA_M	FWD	GGTCACACCACCACAGTCTC
lncRNA_M	REV	GGTTCTGGTGGGAAACTAGG
lncRNA_N	FWD	CGGTCTAGGCAAACGATACA
lncRNA_N	REV	CTTTGTTGTTCAGGCTGCAT
lncRNA_O	FWD	CCCATATACACACACACTACATGG
lncRNA_O	REV	TTTACTTGCTCCGAGGTTTG
lncRNA_P	FWD	CACTTGCCACAGAGACATGA
lncRNA_P	REV	TCAACATGAAATAGAAACAAACAGC
lncRNA_Q	FWD	ATATCAAGAAGGAGCGGCAT
lncRNA_Q	REV	GCCGAGTGAAGACCCAGTAG
lncRNA_R	FWD	GGAAGCTTGGAGAGGCTACA
lncRNA_R	REV	CCTTGGCAAGTCAACAACC
lncRNA_S	FWD	TAAGGCAACAGCTACAACGC
lncRNA_S	REV	TGACAGAGGCATAGGGACTG
lncRNA_T	FWD	ACTGAGGAACTGTGCTGTGC
lncRNA_T	REV	AGCACTTTGAGGGTCAGCTC
lncRNA_U	FWD	GCCACTAATAGCCAGCACAA
lncRNA_U	REV	GAGGTCAGACACCCAAGGAC
lncRNA_V	FWD	GTCTTCTGCATGAAACGGAA
lncRNA_V	REV	AAGCTGTGTGGGATTTAGGG
lncRNA_W	FWD	GATAAGCTTCCCAGGAGTGG
lncRNA_W	REV	GCAGGAGAATCCAAGACACA
lncRNA_X	FWD	TTAAGCACGGTGGATCAAAG
lncRNA_X	REV	TTGTTGAAGCTCTTGCTGCT
lncRNA_Y	FWD	TGCTAGTGAGCAACTTCCCA
lncRNA_Y	REV	CGAAGCTCCTTCCTGCTACT
lncRNA_Z	FWD	ATCTGACTTTGCATGGCTTG
lncRNA_Z	REV	CCTACACACACGAAAGAAGCA
lncRNA_AA	FWD	AATGCTTTGTTTGCACTTGG
lncRNA_AA	REV	CACCGCTCCTCTAAGGTCTC
lncRNA_BB	FWD	AAGCTGCTCTCAACCTTTCC
lncRNA_BB	REV	TTATGGCGACTGGGTATTCA
lncRNA_CC	FWD	TGGTGTACTTGGAACCTGGA
lncRNA_CC	REV	AAGTTGTCGGGCCTGAATAG
lncRNA_DD	FWD	CCTTGTTCAGCCATATGCAC
lncRNA_DD	REV	AAATCCAGAAGCAGAAAGGC
lncRNA_FF	FWD	CCATATAGGAGCCAGGAGGA
lncRNA_FF	REV	AAGCTTGTCTGGGAGAGAGC
lncRNA_GG	FWD	CGAGTCCCTGAGTGTCTTCA
lncRNA_GG	REV	TGAAACTGGAAGACAGTCTATAACAA
lncRNA_HH	FWD	GAACACTGGTCCAAACCAAA
lncRNA_HH	REV	TACCCAGGGCTGTAGGGTAG
lncRNA_II	FWD	TGGTGAAAGGATTTGGCATA
lncRNA_II	REV	ATTTCTGAGGACGTGGTGTG
mNR2F1	FWD	GAA AGC CTG CAG GAG AAA TC
mNR2F1	REV	CTC GAT GAC AGA GGA GGA CA
mGAPD	FWD	CTGGAGAAACCTGCCAAGTA
mGAPD	REV	TGTTGCTGTAGCCGTATTCA
mHPRT1	FWD	GCTGACCTGCTGGATTACAT
mHPRT1	REV	TTGGGGCTGTACTCTTAAC
hNR2F1-AS1-short	FWD	CCTTGCCTTTGATGTTTCAG
hNR2F1-AS1-short	REV	AACTGTCATGCCAAATCCTG
hNR2F1-AS1-long	FWD	AGTAGGGTTTGCGCTGCTAT
hNR2F1-AS1-long	REV	TCCATGGCCTATTAGGAACC
hNR2F1	FWD	CAAGAAGTGCCTCAAAGTGG
hNR2F1	REV	GTACTGGCCTGGATTGGG
hGAPD	FWD	GAGTCAACGGATTTGGTCGT
hGAPD	REV	TTGATTTTGGAGGGATCTCG
hHPRT1	FWD	TGACACTGGCAAAACAATGCA
hHPRT1	REV	GGTCCTTTTCACCAGCAAGCT
mNlgn3	FWD	AAGACCGGGGATCCCAACAA
mNlgn3	REV	GGCCCGGTAATGATCACGAA
mTubb4a	FWD	AGCCATCTCGTCCAGAGCTA
mTubb4a	REV	ATGACCTCCCAGAACTTGGC
mZfp703	FWD	CCAATTGAGCTGGACGCCAA
mZfp703	REV	GAGTTGAGCTTGGATGAGGGC
mNeuroD2	FWD	CGGATCTGGTGTCCTACGTG
mNeuroD2	REV	CACGGGTATGGGTACGGATG
RT-PCR
mlnc-NR2F1 exon-exon 1	FWD	TGG CCA TGG AAT GGT GTA GC
mlnc-NR2F1 exon-exon 1	REV	TTC CTG TGG GGT CCT CAA GT
mlnc-NR2F1 exon-exon 2	FWD	TGT GCC TGC AAG AGG AAC TC
mlnc-NR2F1 exon-exon 2	REV	TCC TGT GGG GTC CTC AAG TT
mlnc-NR2F1 exon-intron 1	FWD	AGA GAA CTC CCA GTT TCA GTC AT
mlnc-NR2F1 exon-intron 1	REV	CTC TTG CAG GCA CAA ACA AGG
mlnc-NR2F1 exon-intron 2	FWD	ACC ATC TTC AGA GTT TGT AGC C
mlnc-NR2F1 exon-intron 2	REV	GCA TCA CAC TAG GTC ACA GCA
XIST	FWD	AGT GCT CTA TAC GTG GCG GT
XIST	REV	ATG CAA CCC CAG CAA TAG TC
