# Supplementary material for: The novel lncRNA lnc-NR2F1 is pro-neurogenic and mutated in human neurodevelopmental disorders
Source: eLife. 2019 Jan 10;8:e41770. doi: 10.7554/eLife.41770 (PMC6380841; doi:10.7554/eLife.41770)
Supplement: Supplementary file 5. [file elife-41770-supp5.xlsx]

## Sheet: mouse_lnc-NR2F1
Target is oriented in the 5' to 3' direction
probes are oriented in the 3' to 5' direction
RNA_FISH_mouse_lnc-NR2F1
probe_1	ataagtggaagggcggagta
probe_2	gaaactccgtgaagaactcc
probe_3	gtcataaccgtgaccaacgc
probe_4	agctaccctgtcaaggacaa
probe_5	gtaccttaccacatcgtcta
probe_6	gacgtctaccaaagttatca
probe_7	acgacttacgaggaacaaac
probe_8	aaatacataccggtaacgac
probe_9	tggatcacactacgagatga
probe_10	aggtgacttgagacgaacga
probe_11	ttgactcctggaatcgatat
probe_12	caacaactccttcctcgaaa
probe_13	gttatcttctttggttcgtc
probe_14	aaggtgacaactgtgttgac
probe_15	tgcctagggatgaaatacgt
probe_16	tctacgatacttctgatgag
probe_17	agactacaaagggataaccc
probe_18	cttcatactacgaagtaacc
probe_19	tcactttttccttctagact
probe_20	ggacggcccatttgataaac
probe_21	cgtatttgaactcctggggt
probe_22	cctttcggtctacaacagta
probe_23	cgaagtttggtgttaagacg
probe_24	cccactaactccggaatata
probe_25	accttgatctgaagtcctaa
probe_26	ataccaacaccattatttca
probe_27	acattctaagtttgagactg
probe_28	tgattgaaggttcagggaag
probe_29	tttcacgacataatttgacg

## Sheet: mouse_NR2F1
Target is oriented in the 5' to 3' direction
probes are oriented in the 3' to 5' direction
RNA_FISH_mouse_NR2F1
probe_1	ttctataccgttaccatcaa
probe_2	gttcgtgatgccggttaagt
probe_3	cccgacgttttcaaagaagt
probe_4	ggcgtccttgaattgaatgt
probe_5	gttgtccttgacagggtagc
probe_6	gcgttggtcacggttatgac
probe_7	gagttcttcacggagtttca
probe_8	ggtcatacgtgagtgtttgc
probe_9	ctaggagagttaccggtgac
probe_10	atgtaaagagacgacgacgc
probe_11	gttgttgtagtacccgtagc
probe_12	gaggagaagtcgcggcagct
probe_13	aagaagggcctagacgtcta
probe_14	gctcgacaagcacgagttgc
probe_15	tacctggtgtaggcgtagaa
probe_16	gcagctgagacggctcatgt
probe_17	agtttcggtagcacgataag
probe_18	cagtctacgaacaccggaca
probe_19	ctacgacgggtgtagctttc
probe_20	cgaaaccgtttgacgacgac
probe_21	taacgggagagaagcgtgtc
probe_22	aggagacagtagctcgttga
probe_23	agaagcatgcaaaccatcca
probe_24	ttgagggtagctttgagagt
probe_25	gctctatacaacgacagtcc
probe_26	cgtcaaagttgaccggaatg
probe_27	aggtaggtcacaaggatctg
probe_28	gatctctgattctcctgaga
probe_29	cttacgttggactcgacgtt
probe_30	gtcctcttttcctctgagta
probe_31	tcctagactagacattcatg
probe_32	ctacctggaaggtcctaaat
probe_33	acctacctacacctatataa
probe_34	tgtcttttgatgagtatacc
probe_35	acctgacttaggatacatct
probe_36	accaaggtttggtctaaagg
probe_37	acgaagaatattactcacgc
