# Supplementary figures and images for: The novel lncRNA lnc-NR2F1 is pro-neurogenic and mutated in human neurodevelopmental disorders
Source: eLife journal article supplement (doi:10.7554/elife.41770), 2019-01-10

Figure 1 - figure supplement 3

A

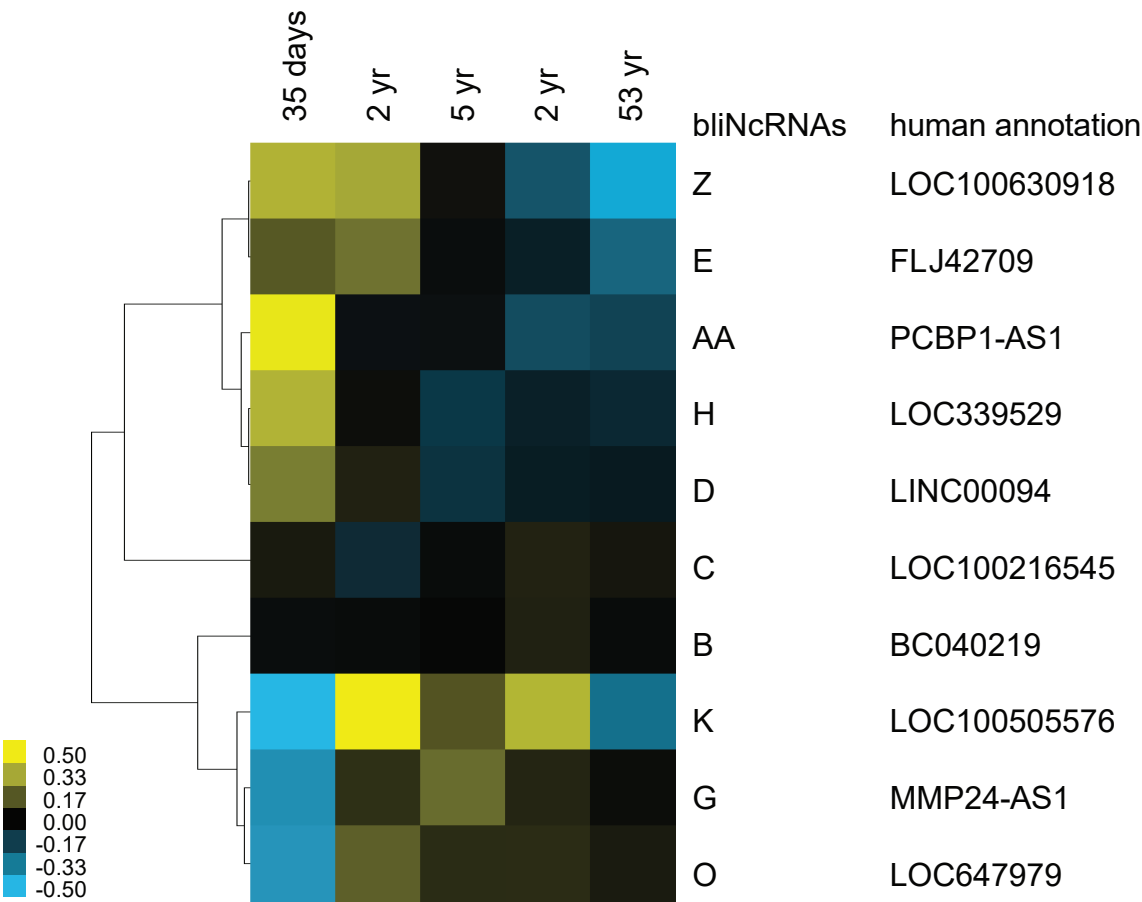

Supplement: supp [file elife-41770-supp-v1.zip]

**Figure 1 - figure supplement 2**

**A**

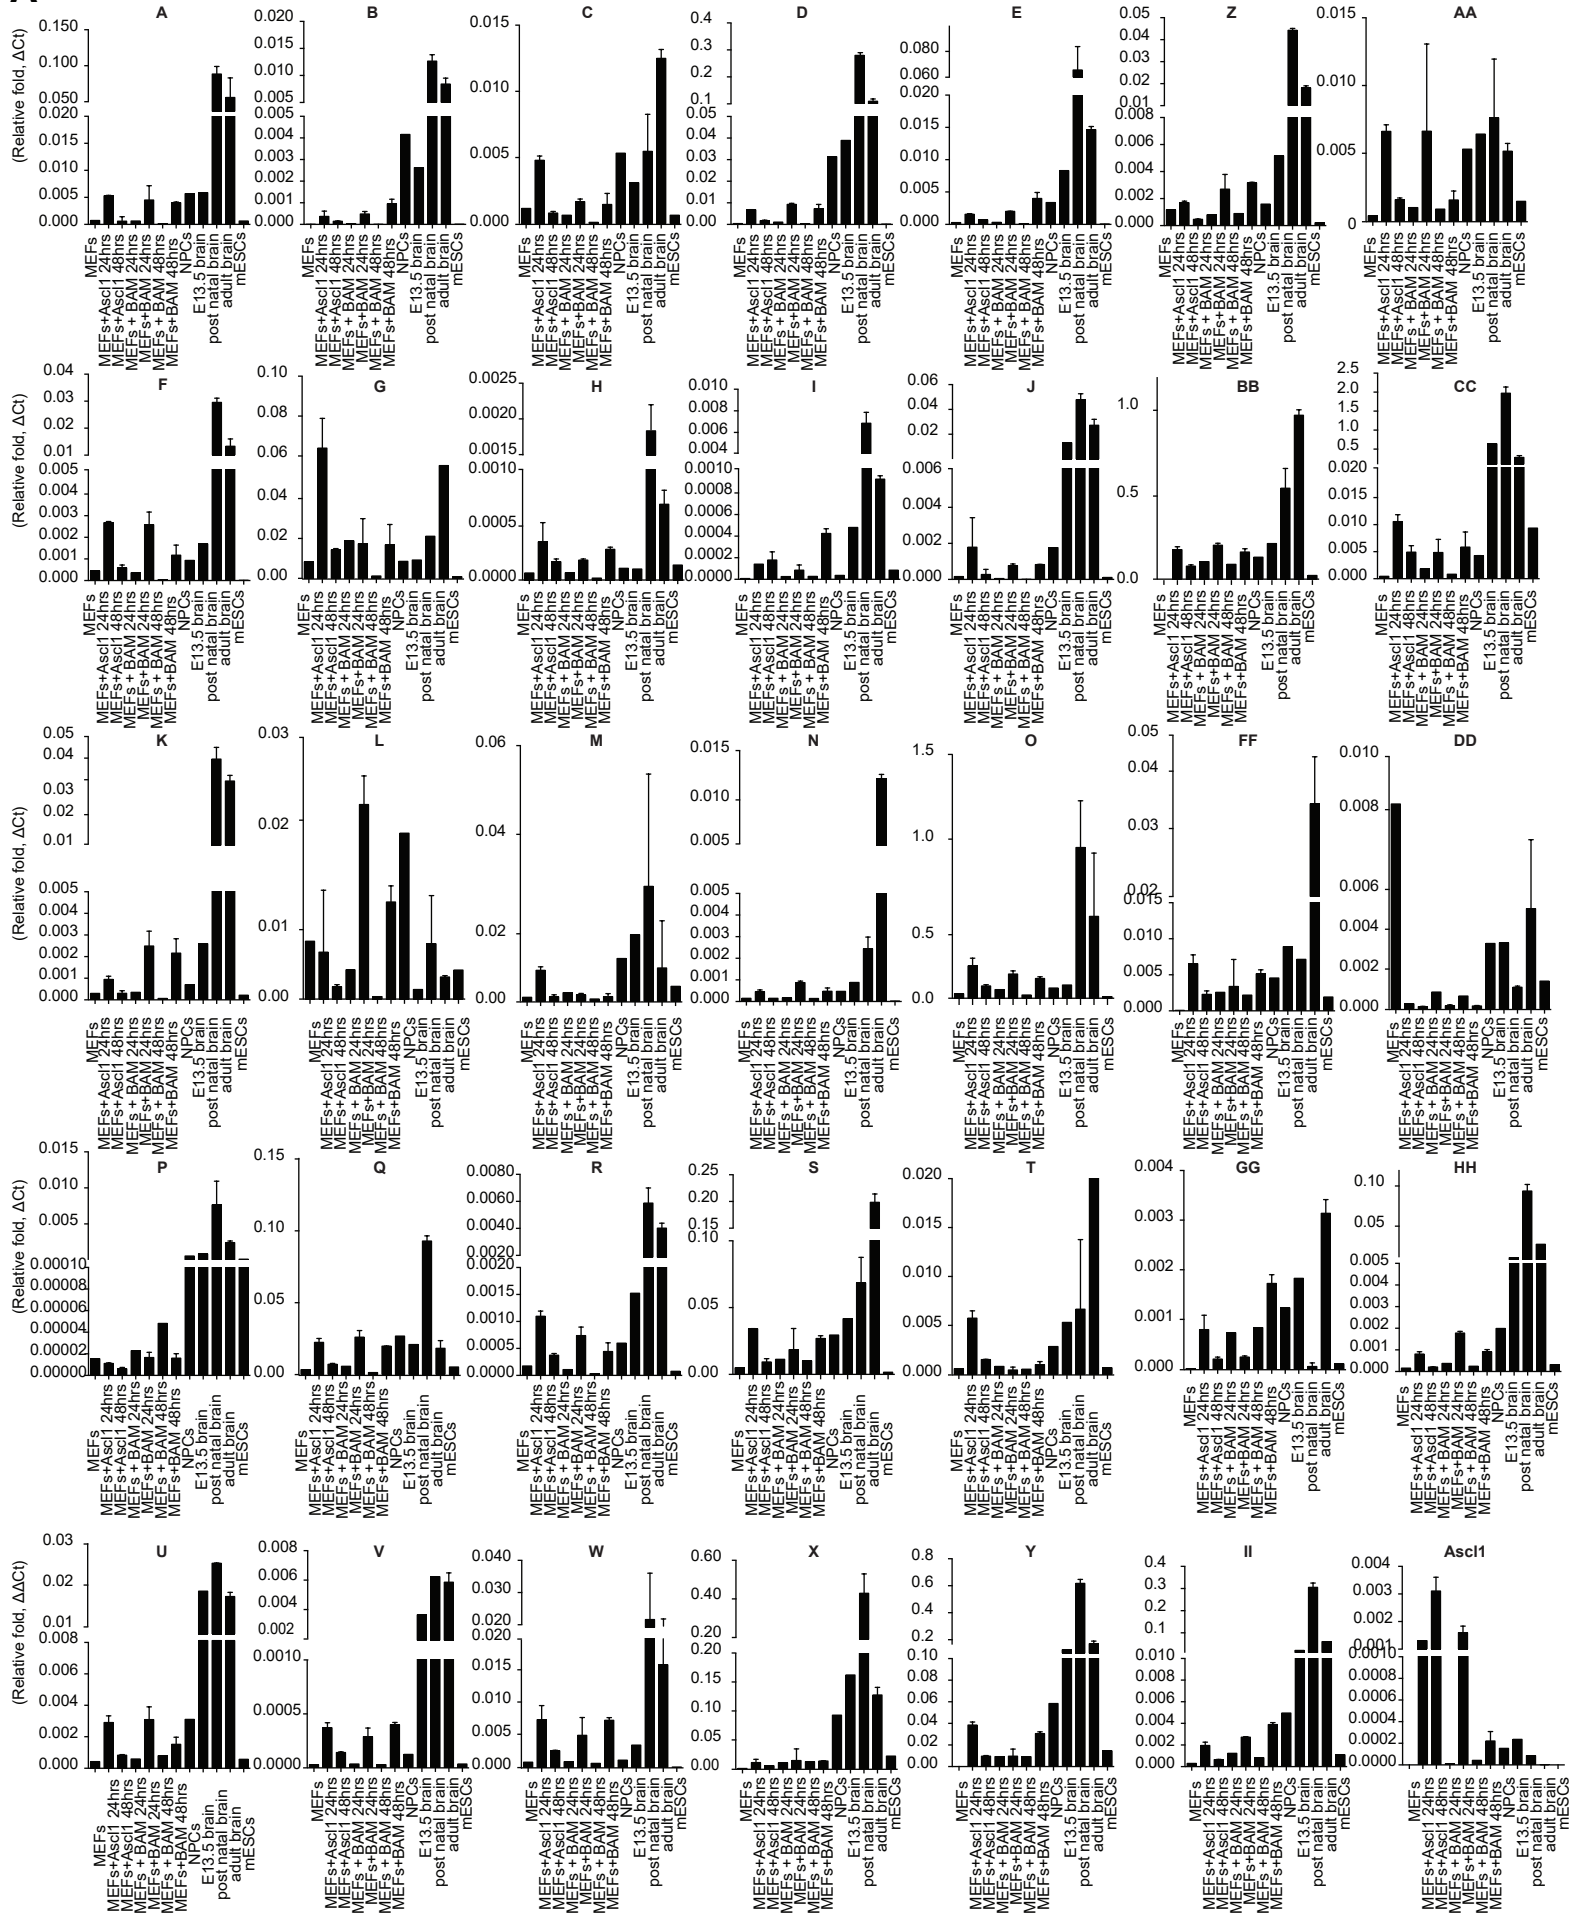

Supplement: supp [file elife-41770-supp-v1.zip]

Figure 1 - figure supplement 4

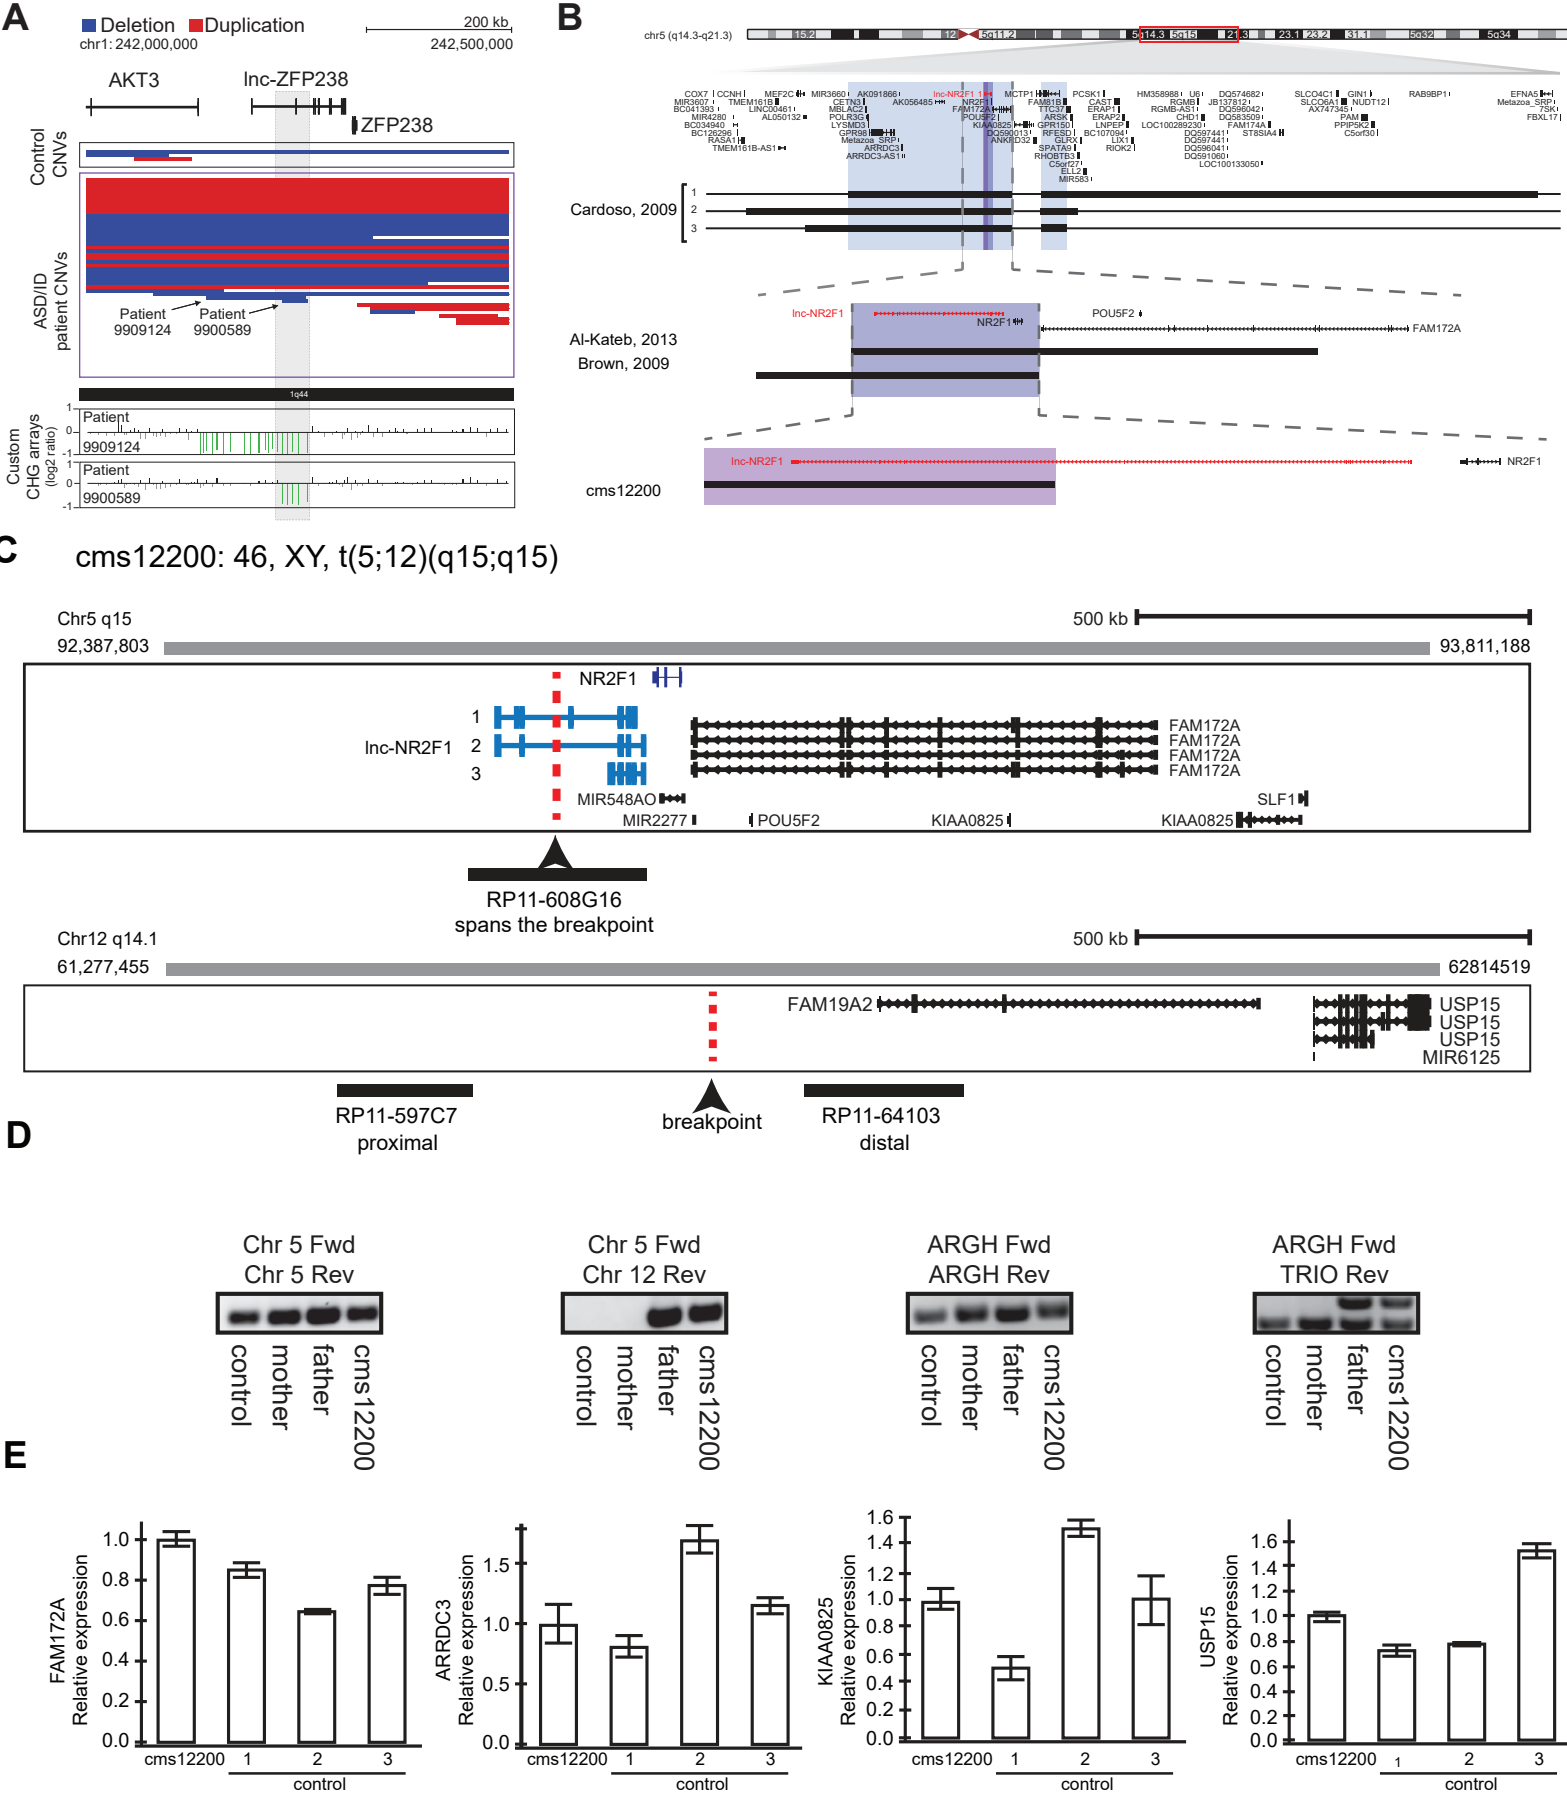

Supplement: supp [file elife-41770-supp-v1.zip]

Figure 1 - figure supplement 1

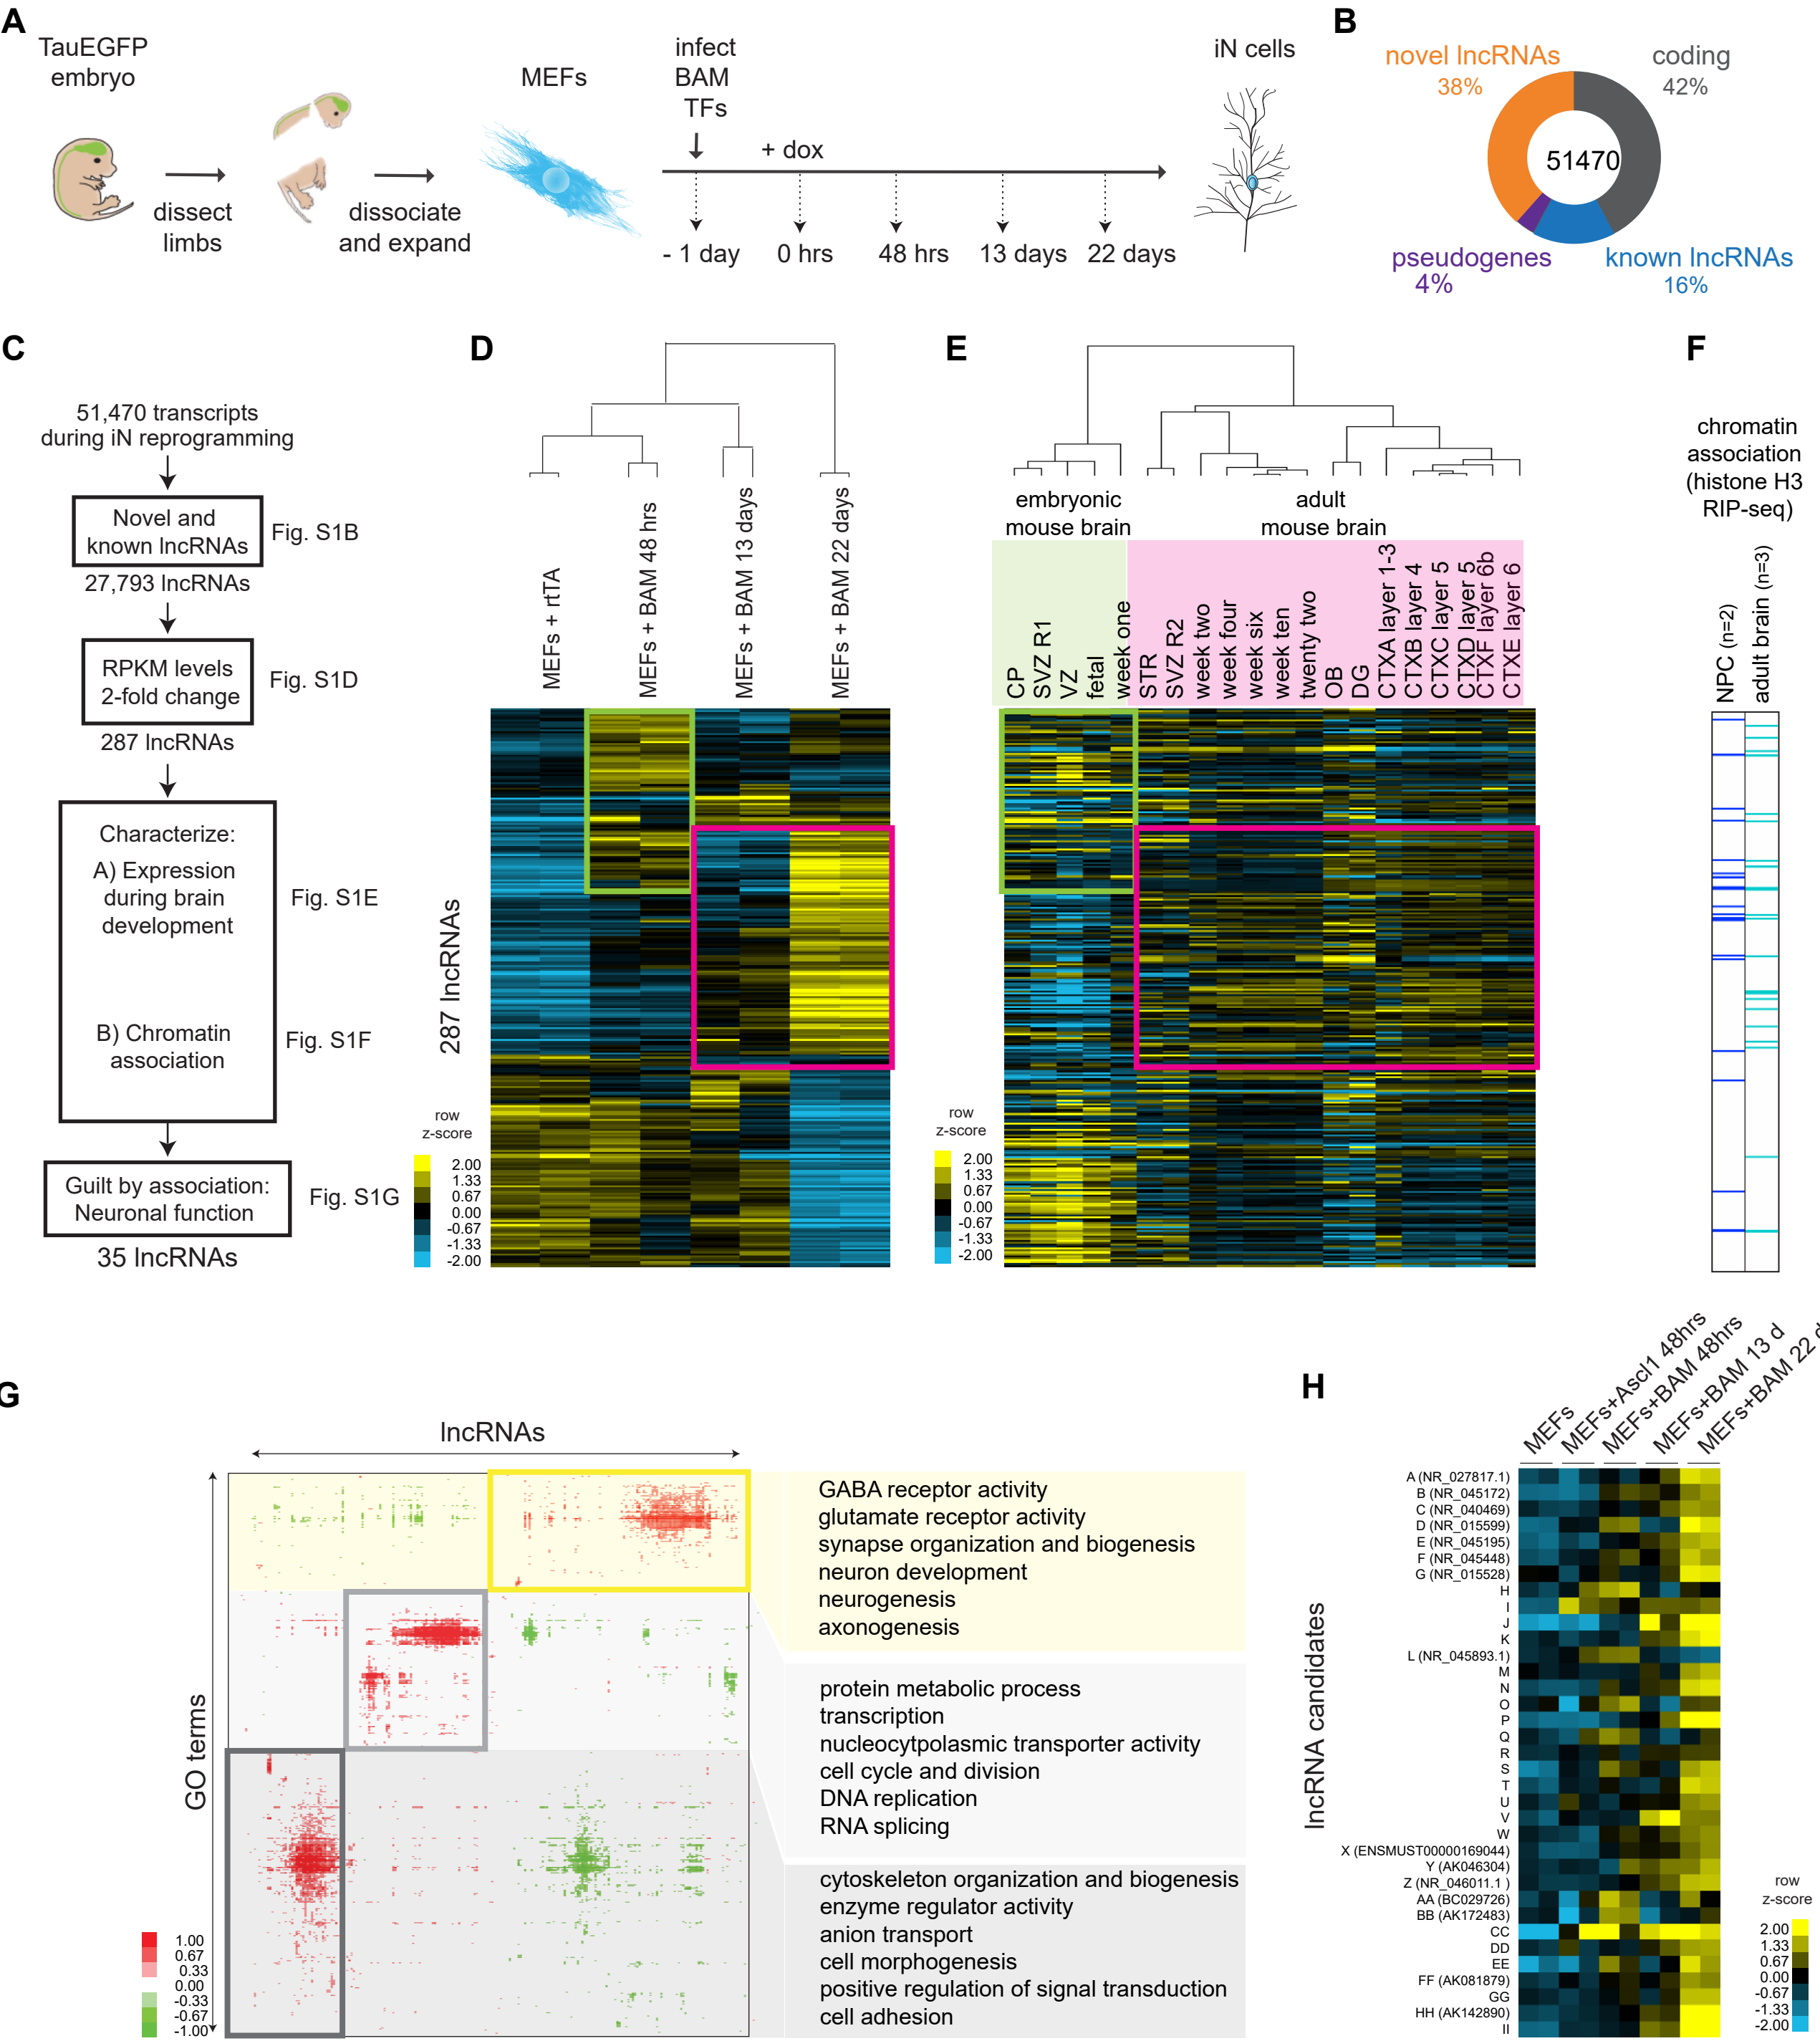

Supplement: supp [file elife-41770-supp-v1.zip]

# Figure 5 - figure supplement 1

Human Inc-NR2F1 ChIRP for hNPC

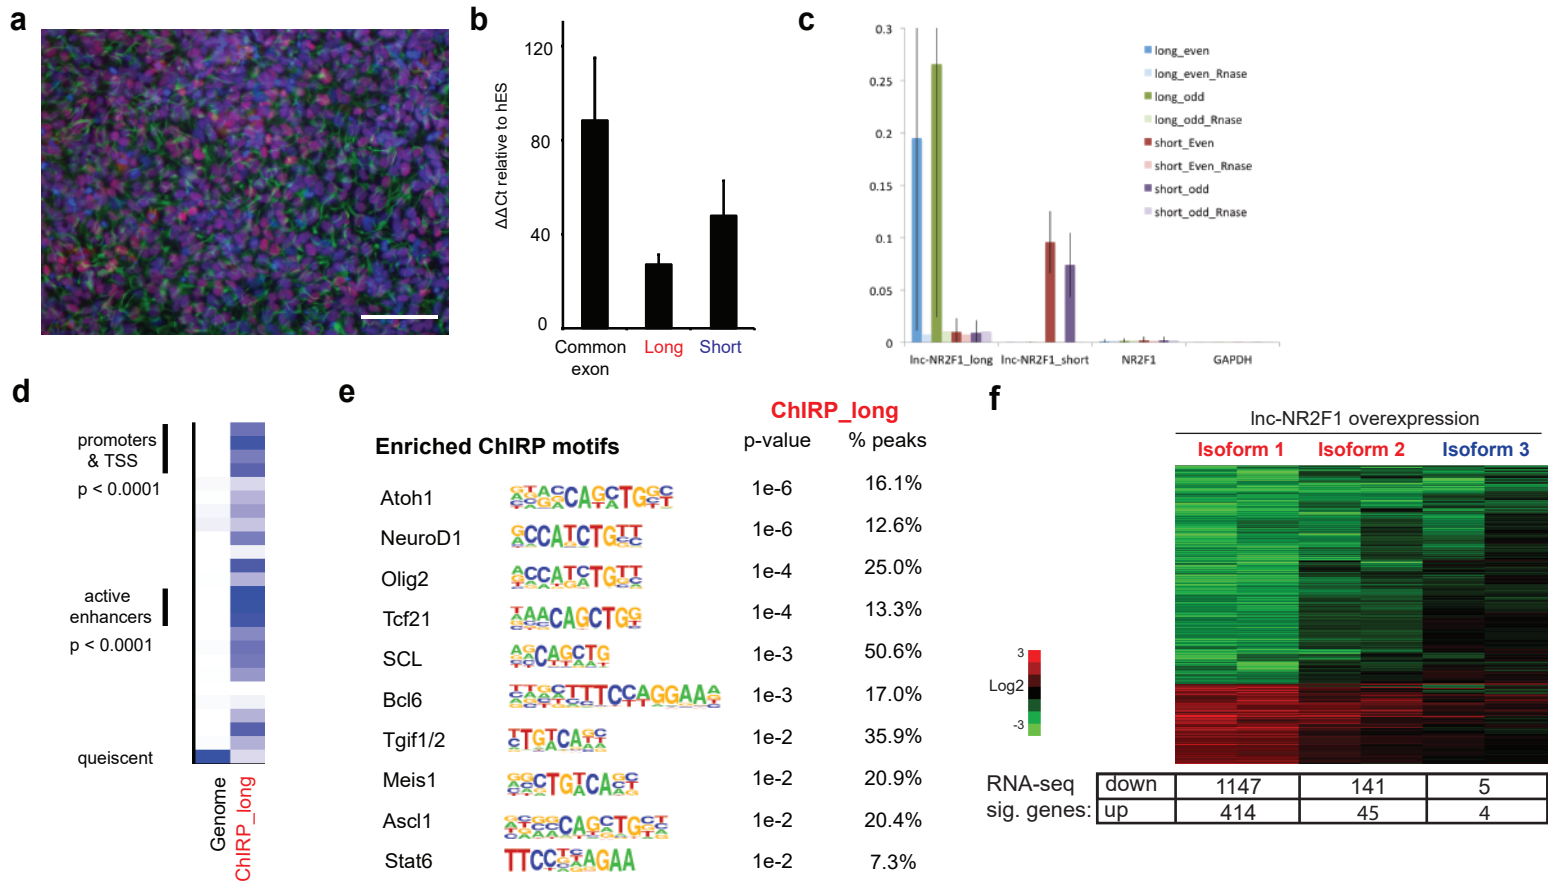

Supplement: supp [file elife-41770-supp-v1.zip]

Figure 2 - figure supplement 2

A

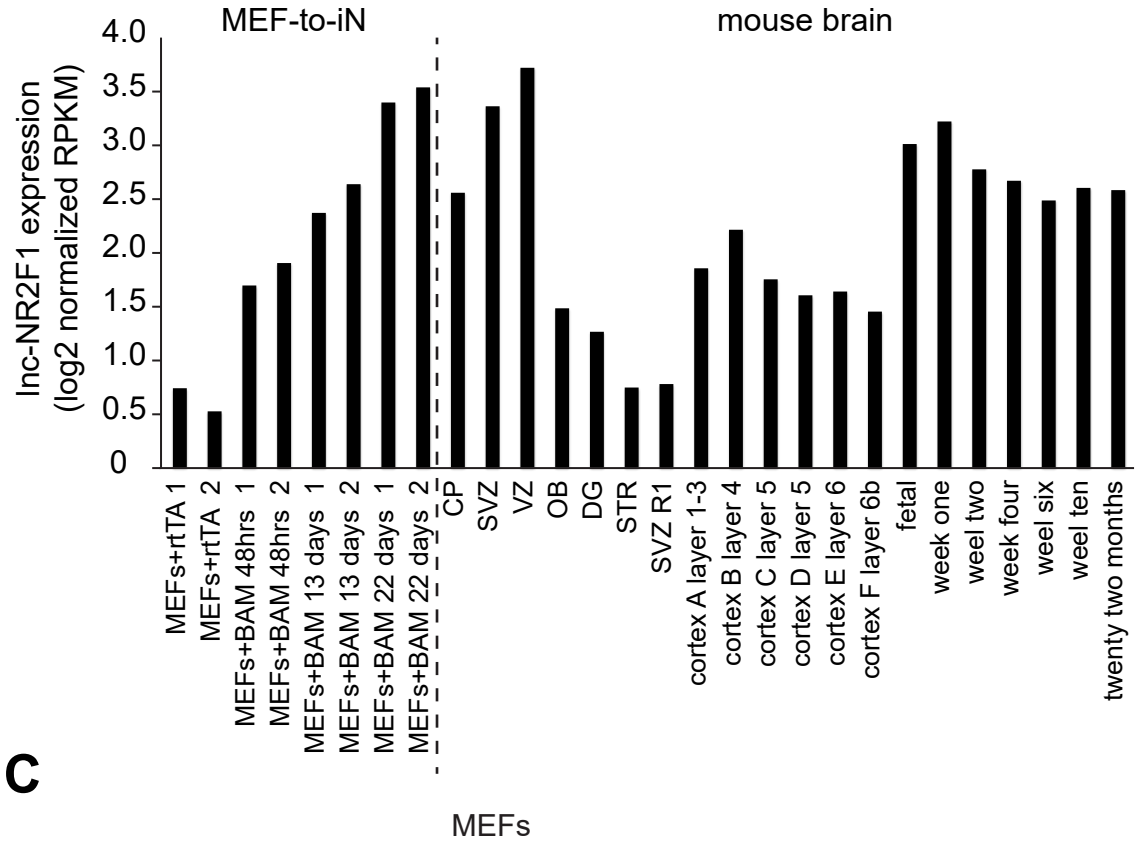

B

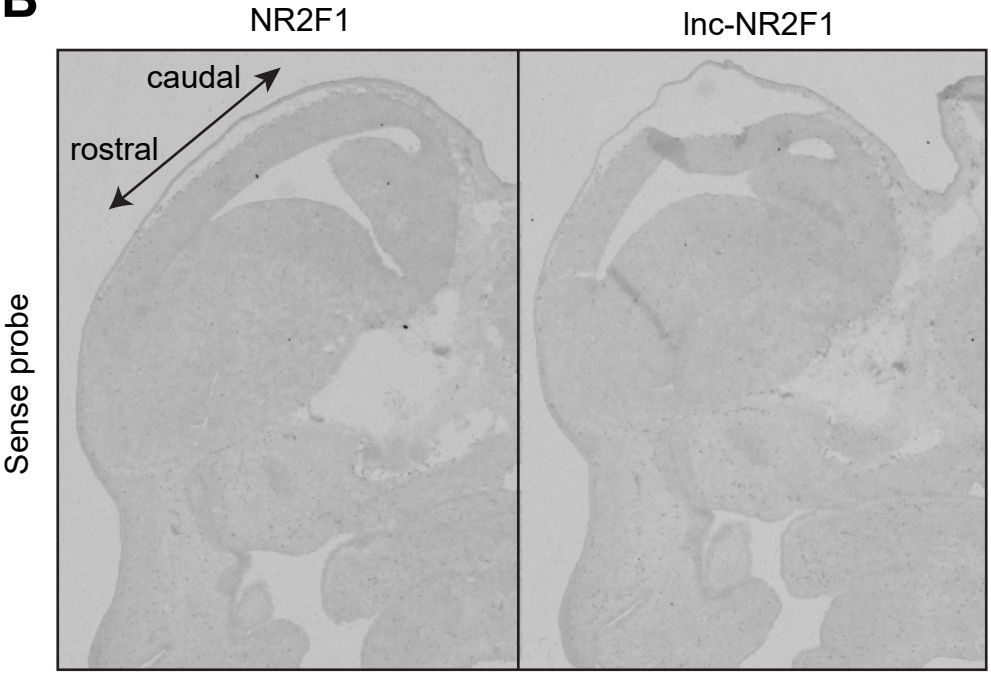

C

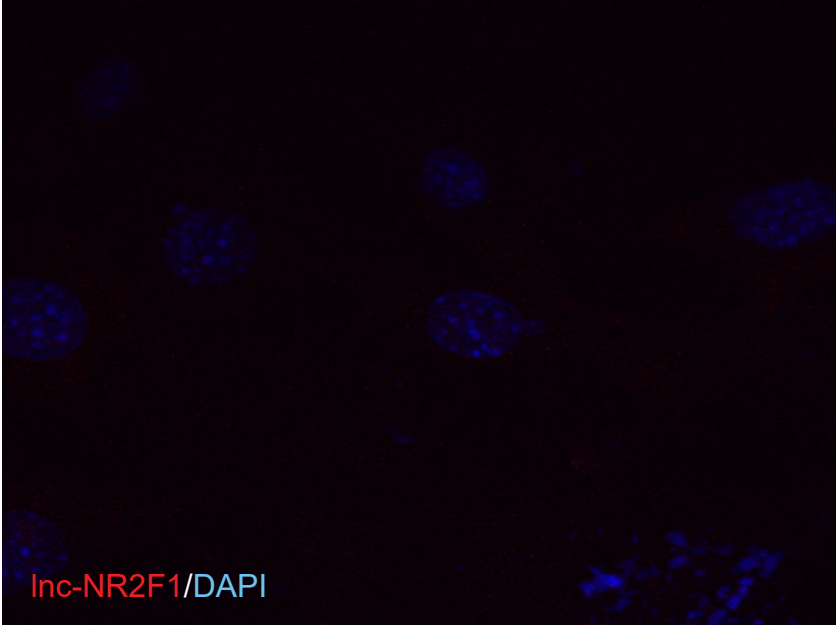

Supplement: supp [file elife-41770-supp-v1.zip]

Figure 3 – figure supplement 1

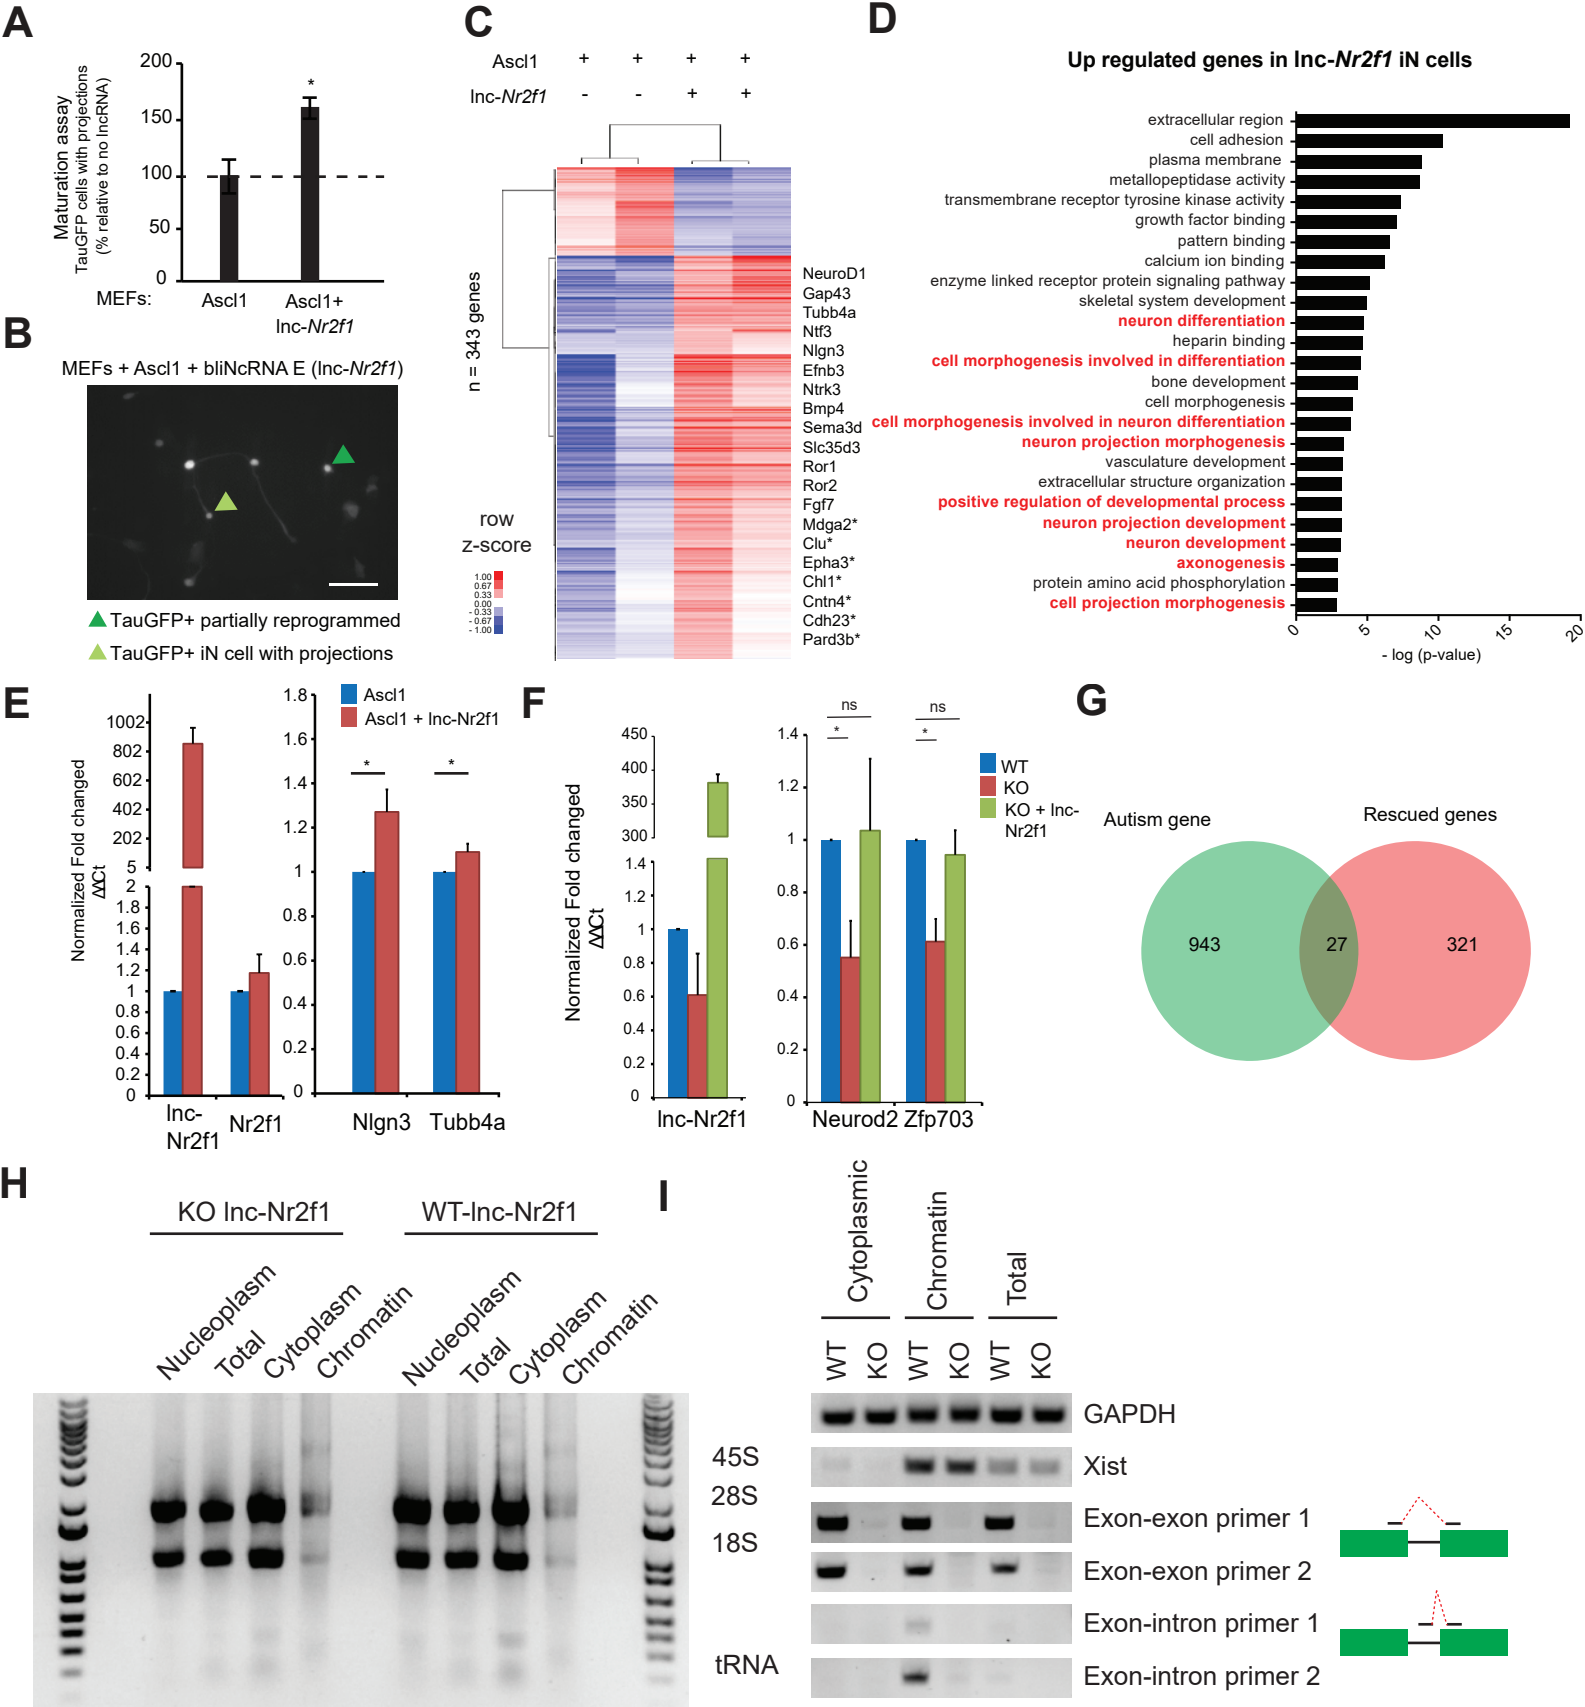

Supplement: supp [file elife-41770-supp-v1.zip]

Figure 4 – figure supplement 1

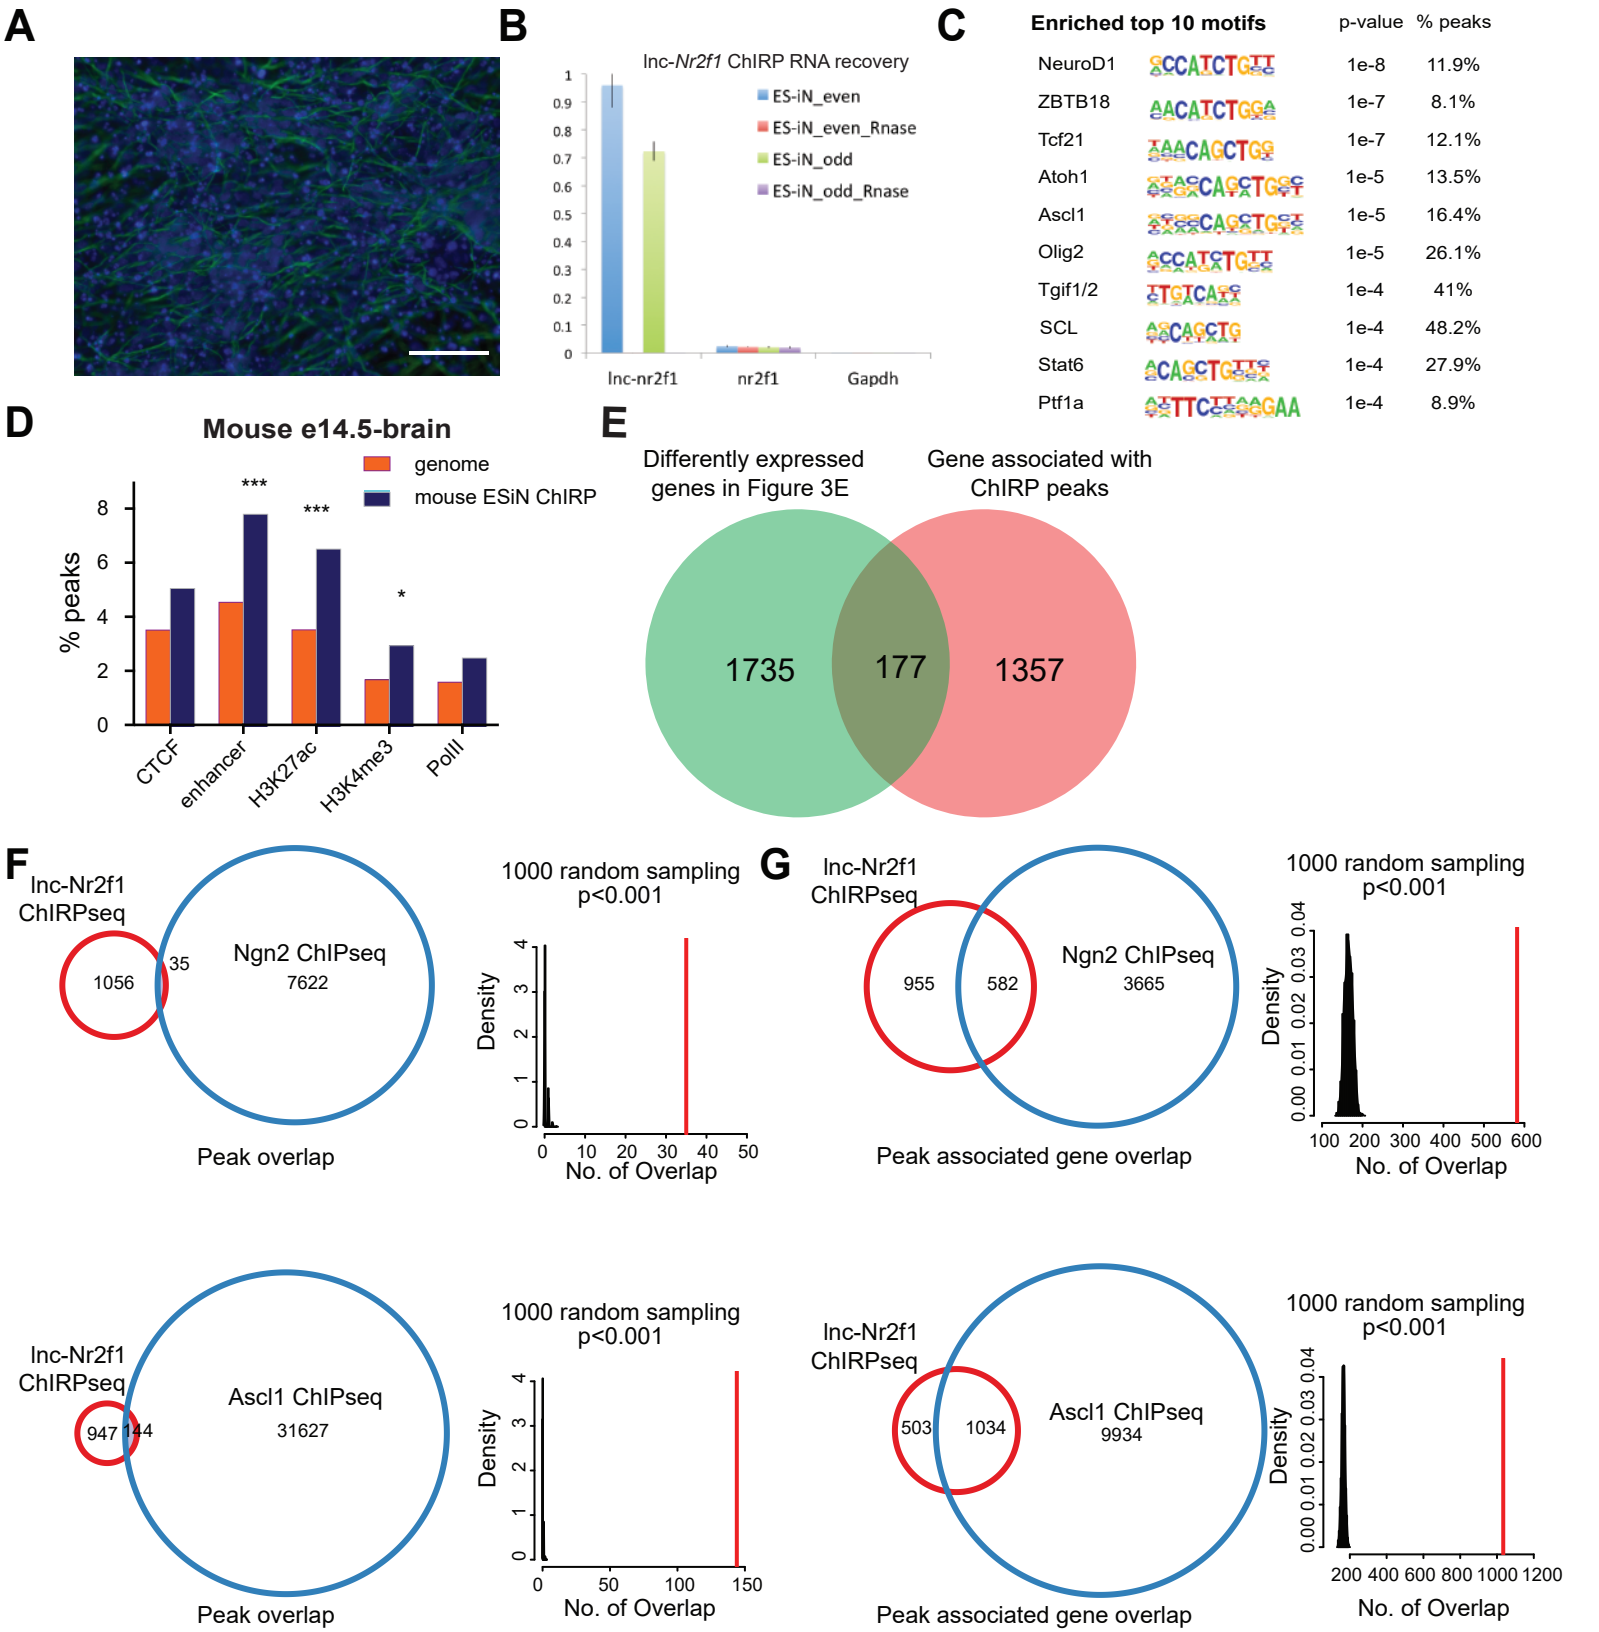

Supplement: supp [file elife-41770-supp-v1.zip]

Figure 3 – figure supplement 2

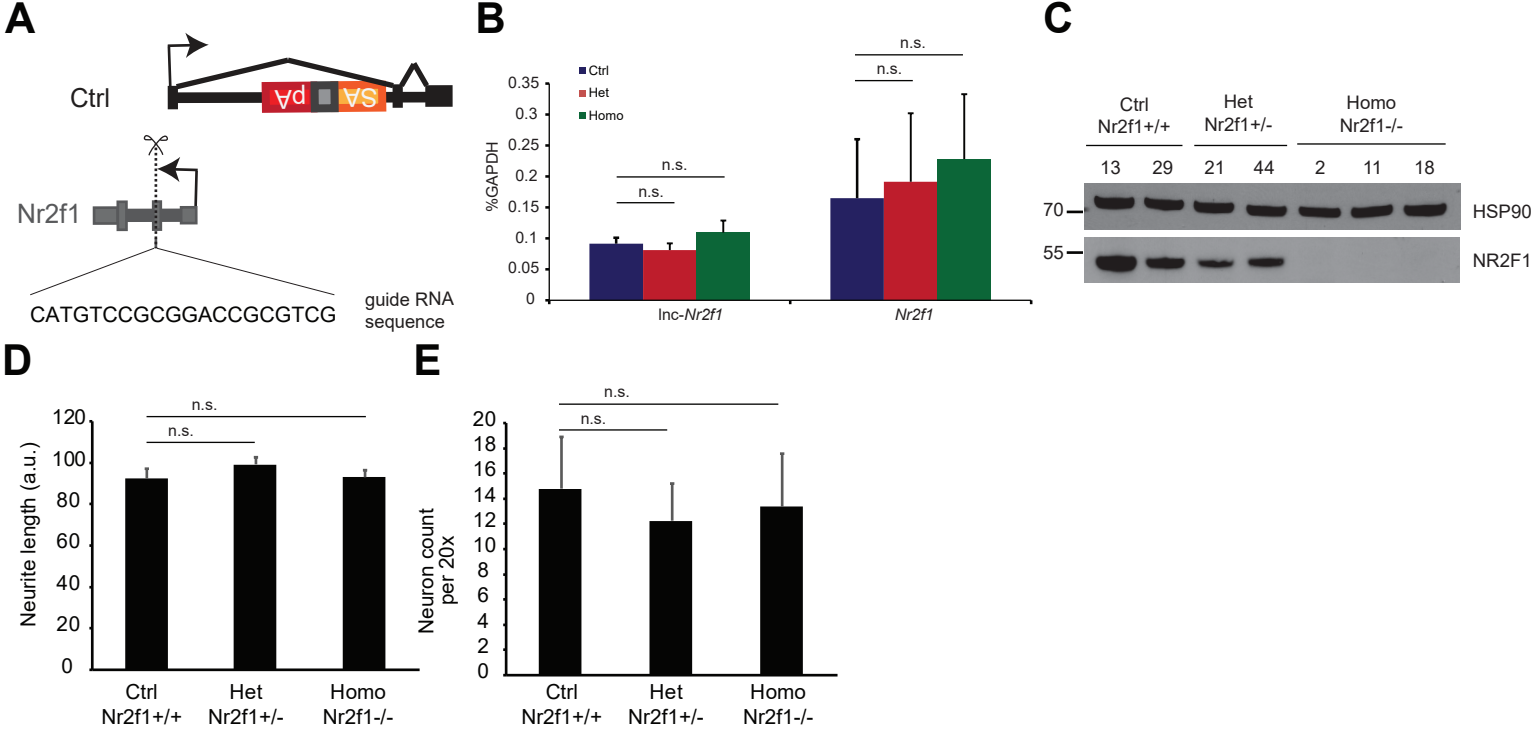

Supplement: supp [file elife-41770-supp-v1.zip]
